# Supplementary material for: Hydrothermal synthesis of WS2 quantum dots and their application as a fluorescence sensor for the selective detection of 2,4,6-trinitrophenol
Source: Royal Society of Chemistry journal article supplement (doi:10.1039/c9nj06159b), 2020-01-01
Supplement: c9nj06159b1.pdf [file c9nj06159b1.pdf]

### Electronic Supplementary Information

## Hydrothermal synthesis of WS<sub>2</sub> quantum dots and their application as a fluorescence sensor for the selective detection of 2,4,6-trinitrophenol

Neema Pallikarathodi Mani, Jobin Cyriac\*

*Department of Chemistry, Indian Institute of Space Science & Technology*

*Thiruvananthapuram – 695 547, INDIA*

*Email: jobincyriac@iist.ac.in*

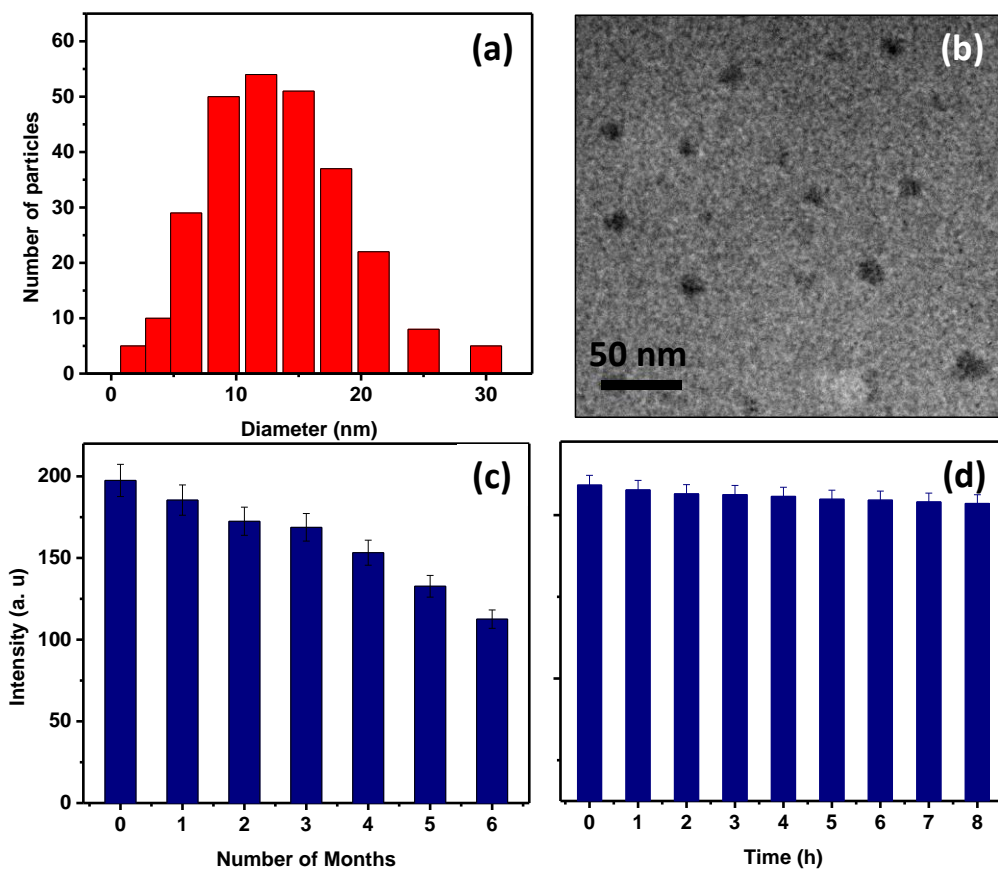

**Figure S1:** (a) Size distribution histogram obtained from TEM images. The histogram shows a distribution of 8 – 20 nm with an average peak at ~12 nm. (b) TEM image showing the average size of the QDs. (c) Fluorescence intensity of WS<sub>2</sub> QDs showing its temporal stability under room temperature for 6 months (d) Fluorescence intensity of WS<sub>2</sub> QDs under 8 h of continuous UV radiation (Power: 8 W) showing its photostability.

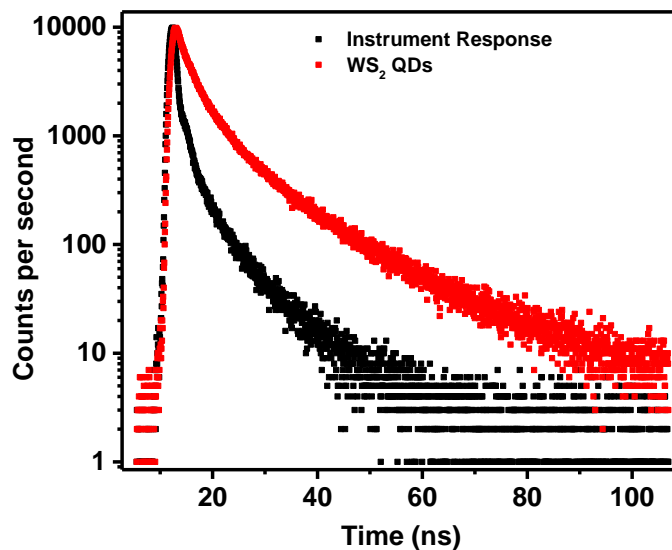

**Figure S2:** Lifetime spectrum of WS<sub>2</sub> QDs

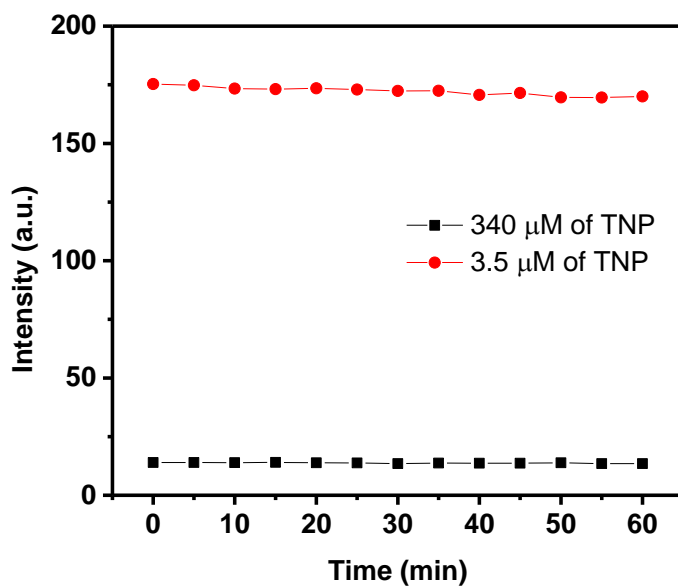

**Figure S3:** Response time of WS<sub>2</sub> QDs towards detection of TNP. Plot showing the PL intensity of WS<sub>2</sub> QDs as a function of time. No apparent variation in the intensity has been observed.

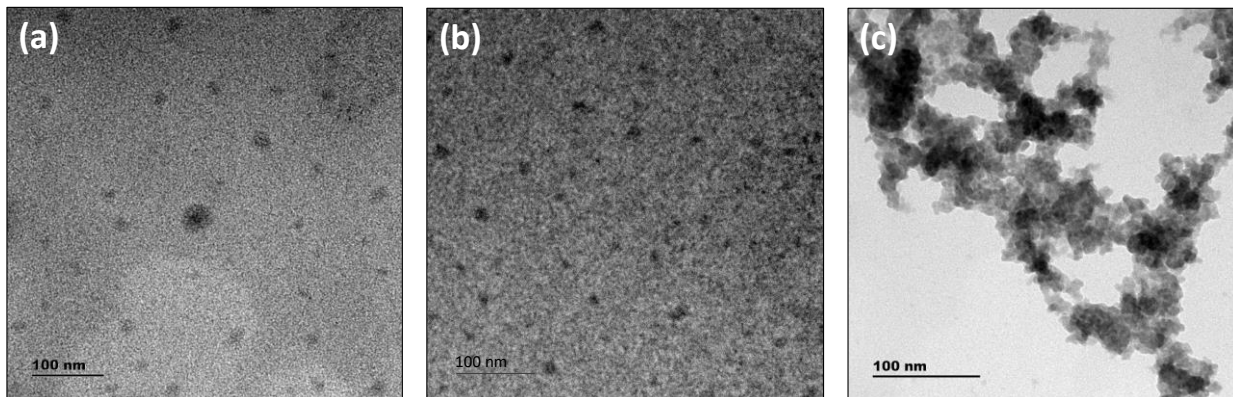

**Figure S4:** TEM image of (a)  $\text{WS}_2$  QDs alone and in the presence of (b)  $100 \mu\text{M}$  and (c)  $250 \mu\text{M}$  concentrations of TNP.

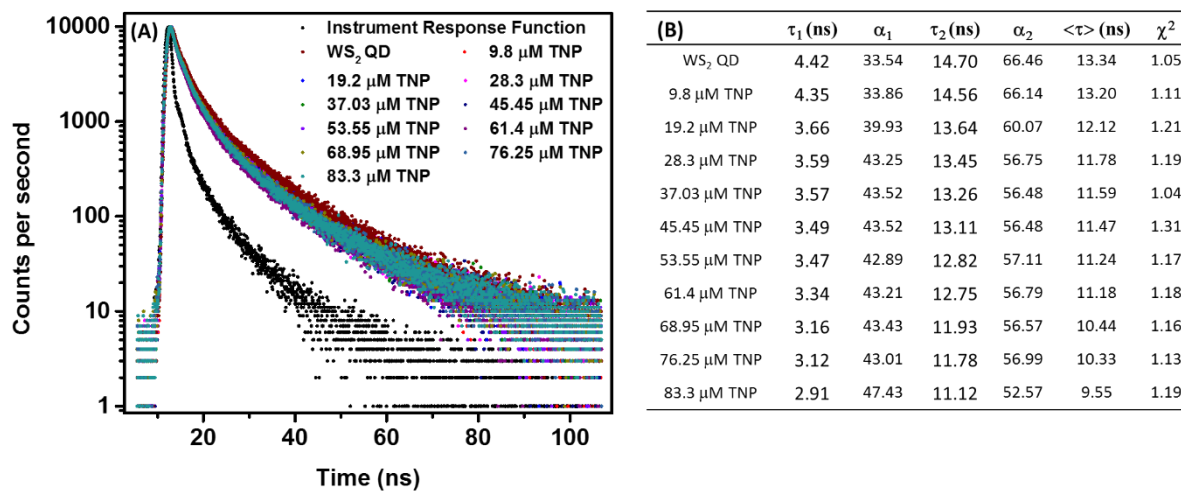

**Figure S5:** (A) Lifetime analysis of  $\text{WS}_2$  NP at different concentrations of TNP. (B) Table showing the corresponding lifetime components along with average lifetime values. The small decrease in the lifetime components and average lifetime with respect to the concentration of TNP marks the complexity of the quenching mechanism involved.

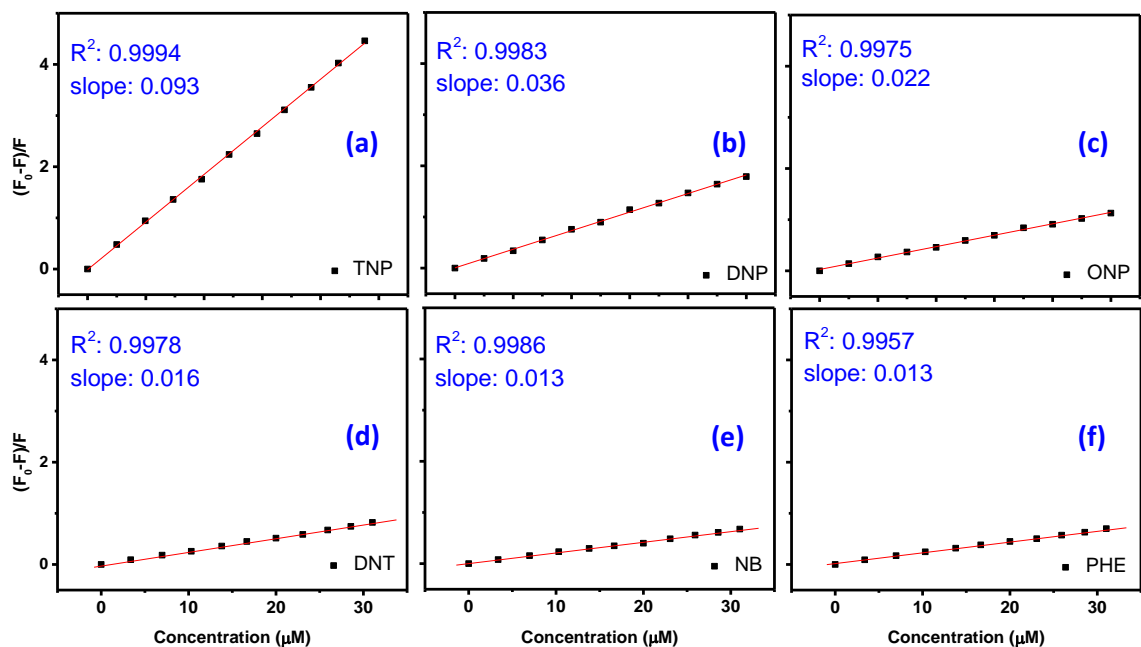

**Figure S6:**  $K_{sv}$  plots of TNP (a), DNP (b), ONP (c), DNT (d), NB (e) and PHE (f)

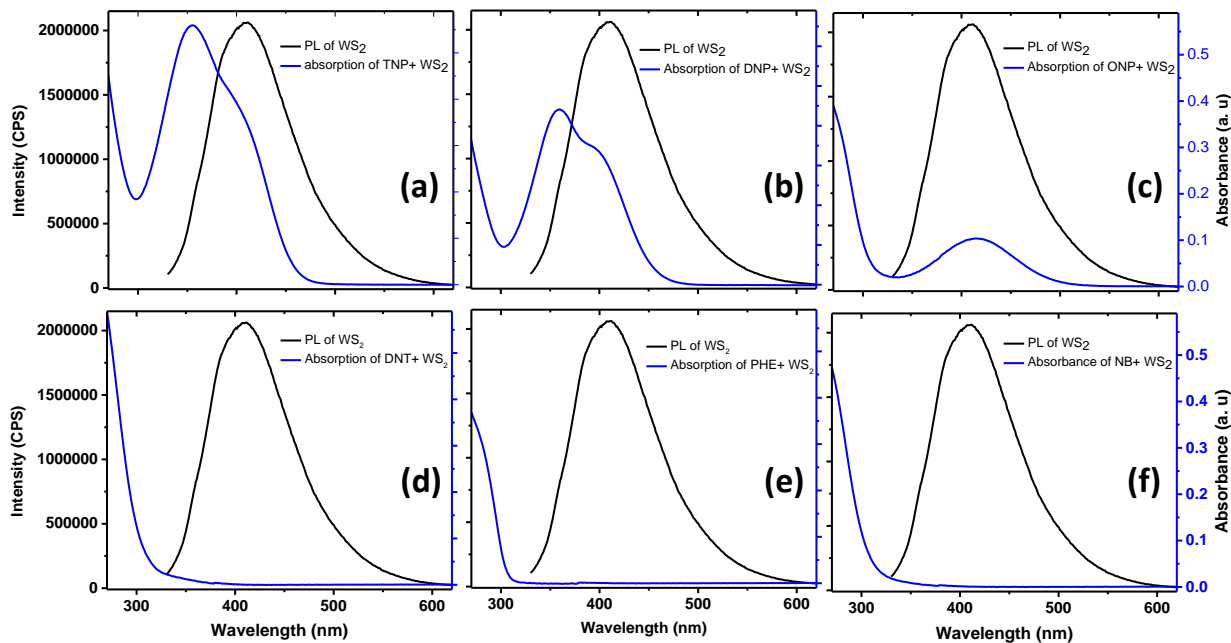

**Figure S7:** Spectral overlap of PL emission spectra of  $WS_2$  with the absorption spectra of  $WS_2$  along with TNP (A), DNP (B), ONP (C), DNT (D), NB (E) and PHE (F).

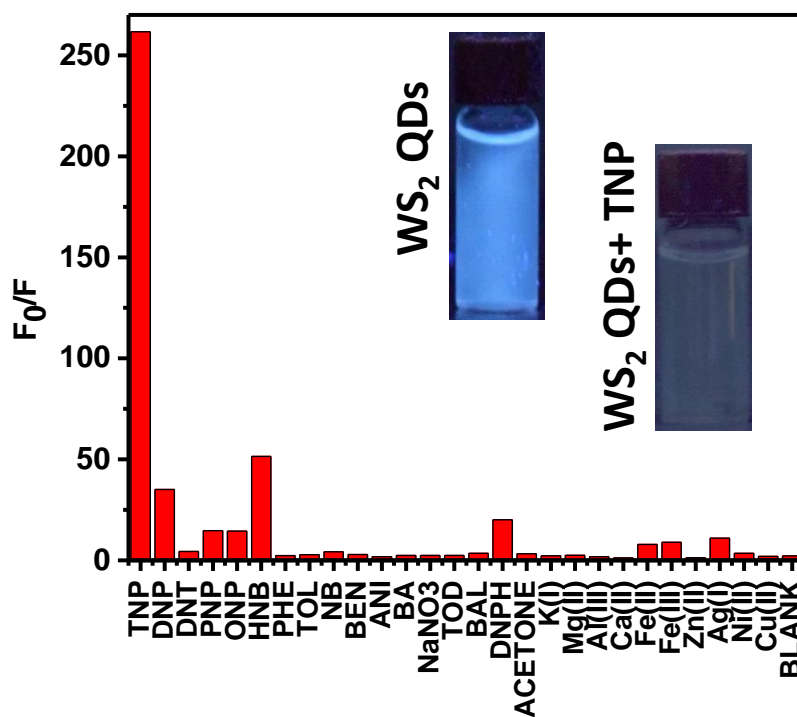

**Figure S8:** Selectivity study; only TNP could quench the PL emission of WS<sub>2</sub> QDs.

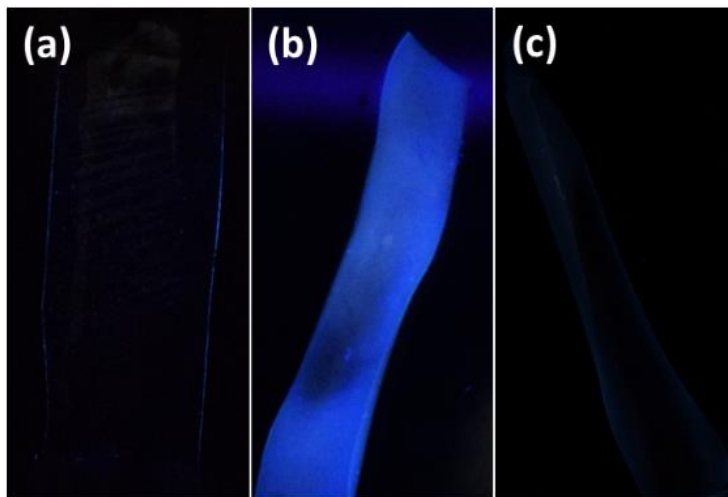

**Figure S9:** Photographs of (a) a PVA film (b) WS<sub>2</sub> QDs incorporated in the PVA film (c) WS<sub>2</sub> QDs -PVA film after keeping in a desiccator containing 100 mg of TNP for one day.

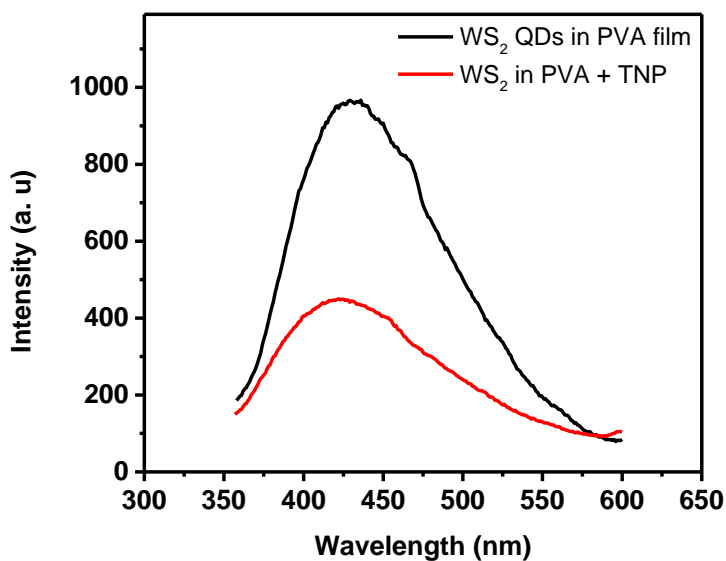

**Figure S10:** The PL emission spectra of (a) WS<sub>2</sub> QDs incorporated in the PVA film (b) the same PVA film after keeping in a desiccator containing 100 mg of TNP for one day.

**Table S1:** Table showing the size distribution from dynamic light scattering (DLS) measurements and zeta potential values of sensor material with and without the presence of the analyte. The reduction in zeta potential indicates the destabilizing action of TNP which in turn leads to the aggregation sensor materials.

|                               | Size (nm)    | Zeta   |
|-------------------------------|--------------|--------|
| WS <sub>2</sub>               | 37.84        | - 21.1 |
| WS <sub>2</sub> +TNP (125 μM) | 92.60, 436.5 | - 10.5 |
| TNP                           | -            | - 0.91 |

**Table S2:** Lifetime analysis of WS<sub>2</sub> QDs with different analytes showing a decrease in the lifetime component.

|                 | $\tau_1$ (ns) | $\alpha_1$ | $\tau_2$ (ns) | $\alpha_2$ | $\langle\tau\rangle$ (ns) | $\chi^2$ |
|-----------------|---------------|------------|---------------|------------|---------------------------|----------|
| WS <sub>2</sub> | 4.42          | 33.54      | 14.70         | 66.46      | 13.3                      | 1.11     |
| TNP             | 3.49          | 43.52      | 13.11         | 56.48      | 9.5                       | 1.31     |
| DNP             | 4.16          | 41.81      | 14.25         | 58.19      | 12.5                      | 1.07     |
| ONP             | 4.11          | 39.62      | 14.39         | 60.38      | 12.7                      | 1.05     |
| DNT             | 4.13          | 37.07      | 14.3          | 62.93      | 12.8                      | 1.09     |
| PHE             | 4.12          | 43.97      | 14.63         | 56.03      | 12.7                      | 1.08     |
| NB              | 4.20          | 33.21      | 14.21         | 66.79      | 12.9                      | 1.08     |

### FRET Efficiency Calculations

FRET Efficiency (E) has been calculated using two methods

- **Method I:** Using steady-state fluorescence data by using equation <sup>1</sup>

$$E = 1 - (F_{DA}/F_D)$$

Where,

$F_{DA}$  is the fluorescence intensity of *Donor* in the presence of *Acceptor*

$F_D$  is the fluorescence intensity of *Donor* alone

FRET efficiency, E= 56.3 %.

- **Method II:** Using time-resolved fluorescence data, FRET efficiency was calculated using the equation<sup>2,3</sup>

$$E = 1 - (\tau_{DA}/\tau_D)$$

Where,

$\tau_{DA}$  is the fluorescence lifetime of *Donor* in the presence of *Acceptor*

$\tau_D$  is the fluorescence lifetime of *Donor* alone

FRET efficiency, E= 28.5 %

### Inner Filter Effect Correction

To eliminate inner filter effect, fluorescence intensity

$$F_{\text{corr}(\lambda_{\text{ex}})} = F_{\text{obs}(\lambda_{\text{ex}})} / W$$

Where, W is correction factor, which can be obtained from the equation

$$W = (1 - 10^{-A_{\text{FL}}}) / A_{\text{FL}}$$

$F_{\text{corr}(\lambda_{\text{ex}})}$  is the corrected fluorescence in the absence of inner- filter effects,  $F_{\text{obs}(\lambda_{\text{ex}})}$  is the measured fluorescence intensity, and  $A_{\text{FL}}$  is the absorbances of the fluorescent component, respectively.

References:

1. J. R. Lakowicz, Principles of fluorescence spectroscopy, Springer Science & Business Media, 2013.
2. K. K. Haldar, T. Sen and A. Patra, *The Journal of Physical Chemistry C*, 2010, 114, 4869-4874.
3. J. H. Han, S. Yamamoto, S. Park and H. Sugiyama, *Chemistry–A European Journal*, 2017, 23, 7607-7613.
4. A. V. Fonin, A. I. Sulatskaya, I. M. Kuznetsova and K. K. Turoverov, *PLoS One*, 2014, 9.
5. X. Li and S. Wang, *New Journal of Chemistry*, 2015,39, 386-395.
